# Supplementary material
Source: MDPI journal article supplement (https://www.mdpi.com/2076-3263/14/5/129)
Supplement: s1 [file s1]

## Online Materials

**Table S1.** Dendrometric measures of the 17 trees growing in the investigated site. DBH, diameter at breast height (130 cm from the ground); I-O, inclined and opposite directions.

| Tree code | Species  | DBH I-O (in the falling direction) [cm] | DBH 90° from I-O [cm] | Trunk slope at 30 cm [°] | Trunk slope at 130 cm [°] | Falling direction [°N] | Day of sampling |
|-----------|----------|-----------------------------------------|-----------------------|--------------------------|---------------------------|------------------------|-----------------|
| AA01      | Chestnut | 44.5                                    | 44.3                  | 83.56                    | 76.6                      | 340                    | 04-06-2021      |
| AA02      | Chestnut | 37.5                                    | 33.8                  | 77.9                     | 65.4                      | 73                     | 04-06-2021      |
| AA03      | Chestnut | 48.2                                    | 50                    | 82.75                    | 78.05                     | 320                    | 04-06-2021      |
| AA04      | Chestnut | 49.5                                    | 45.6                  | 75.8                     | 77.7                      | 300                    | 04-06-2021      |
| AA05      | Chestnut | 47.2                                    | 47.8                  | 89.55                    | 70.85                     | 325                    | 04-06-2021      |
| AA06      | Chestnut | 38.2                                    | 39.7                  | 78.5                     | 69.35                     | 300                    | 04-06-2021      |
| AA07      | Chestnut | 47                                      | 37.8                  | 78.35                    | 75.9                      | 305                    | 04-06-2021      |
| AA08      | Chestnut | 42.2                                    | 47                    | 79.35                    | 61.5                      | 320                    | 04-06-2021      |
| AA09      | Chestnut | 44.3                                    | 42.6                  | 82.5                     | 69.7                      | 339                    | 04-06-2021      |
| BB12      | Chestnut | 40                                      | 38.5                  | 79.6                     | 78                        | 0                      | 12-07-2021      |
| BB13      | Chestnut | 37.7                                    | 38.7                  | 83.1                     | 82.65                     | 336                    | 12-07-2021      |
| BB14      | Chestnut | 39.2                                    | 40.5                  | 76.65                    | 84.3                      | 334                    | 12-07-2021      |
| BB15      | Chestnut | 45                                      | 42                    | 80.8                     | 77.8                      | 18                     | 12-07-2021      |
| BB16      | Chestnut | 46.5                                    | 48                    | 83.65                    | 83.65                     | 270                    | 12-07-2021      |
| BB17      | Chestnut | 45                                      | 40.8                  | 77.3                     | 83.2                      | 289                    | 12-07-2021      |
| BB18      | Chestnut | 46                                      | 48.7                  | 75.85                    | 82.6                      | 210                    | 12-07-2021      |
| BB19      | Chestnut | 34.5                                    | 33                    | 73.6                     | 84.85                     | 281                    | 12-07-2021      |
